# Supplementary material
Source: PubMed Central journal article supplement (PMC3849214)

# A Predictive Model for Epoxide Hydrolase-generated Stereochemistry in the Biosynthesis of 9-Membered Eneidyne Antitumor Antibiotics

Geoffrey P. Horsman,<sup>†,¶</sup> Anna Lechner,<sup>‡</sup> Yasuo Ohnishi,<sup>§</sup> Bradley S. Moore,<sup>‡</sup> and Ben Shen<sup>\*,†,||,Ⓜ,¥</sup>

<sup>†</sup>Division of Pharmaceutical Sciences, University of Wisconsin-Madison, Madison, WI 53705, USA; <sup>‡</sup>Scripps Institution of Oceanography and the Skaggs School of Pharmacy and Pharmaceutical Sciences, University of California-San Diego, La Jolla, CA 92093, USA; <sup>§</sup>Department of Biotechnology, University of Tokyo, Tokyo, Japan; and <sup>||</sup>Department of Chemistry, <sup>+</sup>Department of Molecular Therapeutics, and <sup>¥</sup>Natural Products Library Initiative at The Scripps Research Institute, The Scripps Research Institute, Jupiter, FL 33458, USA.

<sup>¶</sup>Present address: Department of Chemistry, Wilfrid Laurier University, Waterloo, ON N2L 3C5, Canada.

\*To whom correspondence should be addressed: The Scripps Research Institute, 130 Scripps Way, #3A1, Jupiter, FL 33458. Tel: (561) 228-2456. Fax: (561) 228-2472. Email: [shenb@scripps.edu](mailto:shenb@scripps.edu)

## Supporting Information

|                                                                                  |     |
|----------------------------------------------------------------------------------|-----|
| <b>Table S1.</b> Primers used for described cloning and mutagenesis procedures   | S2  |
| <b>Table S2.</b> Plasmids used                                                   | S3  |
| <b>Table S3.</b> Sequence homology among enediyne biosynthesis-associated EHs    | S4  |
| <b>Table S4.</b> EH sequences used to construct phylogram in Fig. 6B.            | S5  |
| <b>Figure S1.</b> Sequence alignment of enediyne biosynthesis-associated EHs     | S8  |
| <b>Figure S2.</b> SDS-PAGE analysis on a 12% acrylamide gel of purified EHs      | S9  |
| <b>Figure S3.</b> Steady-state kinetic analysis of SgcF variants, SpoF, and SgrF | S10 |

**Table S1.** Primers used for described cloning and mutagenesis procedures

| Primer Name            | Sequence                                                                              |
|------------------------|---------------------------------------------------------------------------------------|
| SGR625-NdeI-F          | 5'-CATATGGCACATCACCACCACCATCACGTGGAT<br><b>GACGACGACAAGGTGCGCCCCTTCCGCATCGAC</b> -3'  |
| SGR625-XhoI-R          | 5'- <u><b>CTCGAGT</b></u> CACCGCAGTGAACGGGCGAAC-3'                                    |
| SpoF-NdeI-F            | 5'-CATATGGCACATCACCACCACCATCACGTGGAT<br><b>GACGACGACAAGATGCGCCCGTTCCGGATCCATG</b> -3' |
| SpoF-XhoI-R            | 5'- <u><b>CTCGAGT</b></u> CAGGGCAGCGGACGGATGAAG-3'                                    |
| SgcF-W236Y-F           | 5'-GGCTCGGTCGCCGAGTTCC-3'                                                             |
| SgcF-W236Y-mutF        | 5'-GGATGCGCTG <b>GT</b> AGCCGATGC-3'                                                  |
| SgcF-W236Y-mutF        | 5'-GCATCGGCT <b>ACC</b> AGCGCATCC-3'                                                  |
| SgcF-W236Y-R           | 5'-CATCACGTGGGTGAGCAGCC-3'                                                            |
| SgcF-W176L-mutF        | 5'-GGCGGCGAC <b>CTGGG</b> AAAGGTTCG-3'                                                |
| SgcF-W176L-mutR        | 5'-CGACCTT <b>TCC</b> AGGTTCGCCGCC-3'                                                 |
| SgcF-Q237M-mutF        | 5'-CATCGGCTGG <b>AT</b> GCGCATCCAG-3'                                                 |
| SgcF-Q237M-mutR        | 5'-CTGGATGCG <b>CAT</b> CCAGCCGATG-3'                                                 |
| SgcF-W236Y/Q237M-mutF  | 5'-CATCGGCTAC <b>AT</b> GCGCATCCAGC-3'                                                |
| SgcF-W236Y/Q237M-mutR  | 5'-GCTGGATGCG <b>CAT</b> GTAGCCGATG-3'                                                |
| NcsF2-Y235W-F          | 5'-TTCGGTCCCGAGTTCCTCG-3'                                                             |
| NcsF2-Y235W-R          | 5'-CTAGGACGTCCGCAGCGCG-3'                                                             |
| NcsF2-Y235W-mutF       | 5'-GGCTCCGGG <b>TGG</b> ATGAAGATCC-3'                                                 |
| NcsF2-Y235W-mutR       | 5'-GGATCTTCAT <b>CC</b> ACCCGGAGCC-3'                                                 |
| NcsF2-L176W-mutF       | 5'-GGCGGCGAT <b>TGGGG</b> TGCCTGG-3'                                                  |
| NcsF2-L176W-mutR       | 5'-CCAGGCAC <b>CCCA</b> ATCGCCGCC-3'                                                  |
| NcsF2-M236Q-mutF       | 5'-TCCGGGTAC <b>CA</b> GAAGATCCAGTCG-3'                                               |
| NcsF2-M236Q-mutR       | 5'-CGACTGGATCTT <b>CTGGT</b> ACCCGGA-3'                                               |
| NcsF2-Y235W/M236Q-mutF | 5'-CCGGGTGG <b>CA</b> GAAGATCCAGTCG-3'                                                |
| NcsF2-Y235W/M236Q-mutR | 5'-CGACTGGATCTT <b>CTG</b> CCACCCGG-3'                                                |

Bold letters represent bases added or mismatched from template. Restriction sites are underlined and mutated codons are italicized.

**Table S2.** Plasmids used

| Plasmid | Description                                                             | Reference  |
|---------|-------------------------------------------------------------------------|------------|
| pBS1096 | Stp <sup>R</sup> ; <i>sgcF</i> in pCDF-2 Ek/LIC                         | 3          |
| pBS5042 | Stp <sup>R</sup> ; <i>ncsF2</i> in pCDF-2 Ek/LIC                        | 4          |
| pBS1118 | Amp <sup>R</sup> ; <i>sgrF</i> in pGEM-T Easy                           | This study |
| pBS1119 | Kan <sup>R</sup> ; <i>sgrF</i> in pET29                                 | This study |
| pBS1120 | Amp <sup>R</sup> ; <i>spoF</i> in pGEM-T Easy                           | This study |
| pBS1121 | Kan <sup>R</sup> ; <i>spoF</i> in pET29                                 | This study |
| pBS1122 | Amp <sup>R</sup> ; 566 bp fragment of <i>sgcF</i> W236Y in pGEM-T Easy  | This study |
| pBS1123 | Stp <sup>R</sup> ; <i>sgcF</i> W236Y in pCDF-2 Ek/LIC                   | This study |
| pBS1124 | Amp <sup>R</sup> ; 566 bp fragment of <i>sgcF</i> W176L in pGEM-T Easy  | This study |
| pBS1125 | Stp <sup>R</sup> ; <i>sgcF</i> W176L in pCDF-2 Ek/LIC                   | This study |
| pBS1126 | Amp <sup>R</sup> ; 566 bp fragment of <i>sgcF</i> Q237M in pGEM-T Easy  | This study |
| pBS1127 | Stp <sup>R</sup> ; <i>sgcF</i> Q237M in pCDF-2 Ek/LIC                   | This study |
| pBS1128 | Amp <sup>R</sup> ; 566 bp of <i>sgcF</i> W236Y/Q237M in pGEM-T Easy     | This study |
| pBS1129 | Stp <sup>R</sup> ; <i>sgcF</i> W236Y/Q237M in pCDF-2 Ek/LIC             | This study |
| pBS1130 | Amp <sup>R</sup> ; <i>sgcF</i> W176L/Q237M in pGEM-T Easy               | This study |
| pBS1131 | Amp <sup>R</sup> ; <i>sgcF</i> W176L/W236Y/Q237M in pGEM-T Easy         | This study |
| pBS1132 | Stp <sup>R</sup> ; <i>sgcF</i> W176L/Q237M in pCDF-2 Ek/LIC             | This study |
| pBS1133 | Stp <sup>R</sup> ; <i>sgcF</i> W176L/W236Y/Q237M in pCDF-2 Ek/LIC       | This study |
| pBS5043 | Amp <sup>R</sup> ; 860 bp fragment of <i>ncsF2</i> Y235W in pGEM-T Easy | This study |
| pBS5044 | Stp <sup>R</sup> ; <i>ncsF2</i> Y235W in pCDF-2 Ek/LIC                  | This study |
| pBS5045 | Amp <sup>R</sup> ; 860 bp of <i>ncsF2</i> L176W in pGEM-T Easy          | This study |
| pBS5046 | Stp <sup>R</sup> ; <i>ncsF2</i> L176W in pCDF-2 Ek/LIC                  | This study |
| pBS5047 | Amp <sup>R</sup> ; 860 bp of <i>ncsF2</i> M236Q in pGEM-T Easy          | This study |
| pBS5048 | Stp <sup>R</sup> ; <i>ncsF2</i> M236Q in pCDF-2 Ek/LIC                  | This study |
| pBS5049 | Amp <sup>R</sup> ; 860 bp of <i>ncsF2</i> Y235W/M236Q in pGEM-T Easy    | This study |
| pBS5050 | Stp <sup>R</sup> ; <i>ncsF2</i> Y235W/M236Q in pCDF-2 Ek/LIC            | This study |
| pBS5051 | Stp <sup>R</sup> ; <i>ncsF2</i> L176W/M236Q in pCDF-2 Ek/LIC            | This study |
| pBS5052 | Stp <sup>R</sup> ; <i>ncsF2</i> L176W/Y235W/M236Q in pCDF-2 Ek/LIC      | This study |

Resistance marked as: Amp, ampicillin; Stp, streptomycin; Kan, kanamycin

**Table S3.** Percent sequence identities/similarities between enediyne biosynthesis-associated EHs described in this study

|       | NcsF2 | KedF  | SgcF  | SgrF  | SpoF  |
|-------|-------|-------|-------|-------|-------|
| NcsF2 | -     | 63/74 | 62/75 | 63/73 | 64/75 |
| KedF  |       | -     | 64/75 | 65/75 | 67/77 |
| SgcF  |       |       | -     | 72/81 | 70/83 |
| SgrF  |       |       |       | -     | 72/82 |
| SpoF  |       |       |       |       | -     |

**Table S4.** List of EH sequences used to construct the phylogram in Fig. 6B.

| Organism                                             | Epoxide hydrolase sequences                                                                                                                               |
|------------------------------------------------------|-----------------------------------------------------------------------------------------------------------------------------------------------------------|
| <b>Prokaryotes</b>                                   |                                                                                                                                                           |
| Acinetobacter sp. ADP1                               | YP_045093                                                                                                                                                 |
| Agrobacterium tumefaciens str. C58                   | NP_534160; NP_535865; NP_535669                                                                                                                           |
| Agrobacterium radiobacter AD1                        | CAA73331                                                                                                                                                  |
| Anabaena variabilis ATCC 29413                       | YP_320385                                                                                                                                                 |
| Azotobacter vinelandii AvOP                          | ZP_00417649; ZP_00417027;<br>ZP_00419831                                                                                                                  |
| Bacillus subtilis subsp. subtilis str. 168           | NP_388739                                                                                                                                                 |
| Bordetella bronchiseptica RB50                       | NP_887793                                                                                                                                                 |
| Bradrhizobium japonicum USDA 110                     | NP_767058; NP_774828; NP_767754;<br>NP_771160; NP_769521; NP_773216;<br>NP_773708; NP_774534; NP_767837;<br>NP_774008; NP_772904; NP_770058;<br>NP_774137 |
| Brevibacterium linens BL2                            | ZP_00381314                                                                                                                                               |
| Burkholderia fungorum LB400                          | ZP_00284192; ZP_00278609;<br>ZP_00277201; ZP_00282077;<br>ZP_00278366; ZP_00278122                                                                        |
| Burkholderia pseudomallei K96243                     | YP_110633; YP_107687; YP_110932;<br>YP_106956                                                                                                             |
| Burkholderia thailandensis E264                      | YP_442876; YP_441357; YP_440002;<br>YP_439655; YP_439670; YP_440442                                                                                       |
| Caulobacter crescentus CB15                          | NP_421885; NP_420043                                                                                                                                      |
| Chloroflexus aurantiacus J-10-fl                     | ZP_00768880                                                                                                                                               |
| Chromobacterium violaceum ATCC 12472                 | NP_901164                                                                                                                                                 |
| Clostridium acetobutylicum                           | NP_347356                                                                                                                                                 |
| Colwellia psychrerythraea 34H                        | YP_267577                                                                                                                                                 |
| Corynebacterium sp.                                  | CAA11900                                                                                                                                                  |
| Deinococcus radiodurans R1                           | NP_296269                                                                                                                                                 |
| Gloeobacter violaceus PCC 7421                       | NP_924227; NP_924368; NP_927205                                                                                                                           |
| Kineococcus radiotolerans SRS30216                   | ZP_00615612; ZP_00615274;<br>ZP_00617546                                                                                                                  |
| Leptospira interrogans serovar Lai str. 56601        | NP_713968; NP_712707; NP_713280                                                                                                                           |
| Mesorhizobium loti MAFF303099                        | NP_107141; NP_104428; NP_107140;<br>NP_105306; NP_103292                                                                                                  |
| Mycobacterium avium subsp. paratuberculosis str. K10 | NP_959380; NP_962216; NP_961601;<br>NP_960889; NP_961819                                                                                                  |
| Mycobacterium tuberculosis H37v                      | NP_216350; NP_218134; NP_216454;<br>NP_215640; NP_216730; NP_214648                                                                                       |
| Nocardia farcinica IFM 10152                         | YP_118952; YP_117793; YP_119793;<br>YP_116211                                                                                                             |
| Nostoc punctiforme PCC 73102                         | ZP_00108314; ZP_00107532                                                                                                                                  |
| <i>Nostoc</i> sp. PCC 7120                           | NP_488261; NP_484083                                                                                                                                      |
| Novosphingobium aromaticivorans DSM 12444            | ZP_00873504; ZP_00872884                                                                                                                                  |

|                                                        |                                                                                                          |
|--------------------------------------------------------|----------------------------------------------------------------------------------------------------------|
| Polaromonas sp. JS666                                  | ZP_00503276                                                                                              |
| Pseudomonas aeruginosa PAO1                            | NP_252119; NP_252014; NP_251624;<br>NP_252683;<br>NP_250776                                              |
| Pseudomonas aeruginosa UCBPP-PA14                      |                                                                                                          |
| Pseudomonas fluorescens Pf-5                           | YP_258091; YP_260055; YP_261201                                                                          |
| Pseudomonas fluorescens PfO-1                          | YP_347986; YP_347987; YP_347569;<br>YP_346634; YP_348784; YP_348148;<br>YP_351427; YP_349650             |
| Pseudomonas putida KT2440                              | NP_746733                                                                                                |
| Ralstonia metallidurans CH34                           | ZP_00595941; ZP_00597123;<br>ZP_00598949; ZP_00597041;<br>ZP_00597898; ZP_00564175;<br>ZP_00594247       |
| Ralstonia solanacearum GMI1000                         | NP_519891                                                                                                |
| <i>Rhizobium</i> sp. NGR234                            | AAQ87477<br>CAB59813                                                                                     |
| Rhodopirellula baltica SH-1                            | NP_866425; NP_868953                                                                                     |
| Rhodopseudomonas palustris CGA900                      | NP_948077; NP_948116                                                                                     |
| Rubrivivax gelatinosus PM1                             | ZP_00243135                                                                                              |
| Salmonella typhimurium LT2                             | NP_459327                                                                                                |
| Silicibacter pomeroyi DSS-3                            | YP_165203; YP_166503; YP_166740                                                                          |
| Silicibacter sp. TM1040                                | ZP_00621680                                                                                              |
| Sinorhizobium meliloti 1021                            | NP_436749                                                                                                |
| Streptomyces avermitilis MA-4680                       | NP_824987; NP_823281; NP_821315;<br>NP_823898; NP_825429                                                 |
| Streptomyces carzinostaticus subsp. Neocarzinostaticus | AAM78002; AAM77995                                                                                       |
| Streptomyces coelicolor A3(2)                          | NP_627771; NP_628138; NP_630689;<br>NP_627764; NP_625391; NP_630375;<br>NP_631261; NP_625198             |
| Streptomyces globisporus                               | AAL06662                                                                                                 |
| <i>Synechocystis</i> sp. PCC 6803                      | NP_440962                                                                                                |
| Thermobifida fusca YX                                  | YP_289300                                                                                                |
| Thermosynechococcus elongatus BP-1                     | NP_681708; NP_682856                                                                                     |
| Thrichodesium erythraeum IMS101                        | ZP_00672579                                                                                              |
|                                                        |                                                                                                          |
| <b>Eukaryotes</b>                                      |                                                                                                          |
|                                                        |                                                                                                          |
| Aspergillus nidulans FGSC A4                           | XP_660621; XP_662866                                                                                     |
| Candida albicans SC5314                                | XP_719809                                                                                                |
| Ceanorhabditis briggsae                                | CAE64799; CAE71892                                                                                       |
| Ceanorhabditis elegans                                 | NP_504650; NP_497268; NP_505662                                                                          |
| Cryptococcus neoformans var. neoformans B-3501A        | EAL17134                                                                                                 |
| <i>Danio rerio</i> (zebra fish)                        | NP_957362; AAH55594                                                                                      |
| Debaromyces hansenii CBS 767                           | XP_456371                                                                                                |
| Giberella zeae PH-1                                    | XP_391372; XP_381941; XP_381892;<br>XP_386920; XP_385919; XP_383988;<br>XP_381913; XP_387982; XP_391218; |

|                                          |                                                                                   |
|------------------------------------------|-----------------------------------------------------------------------------------|
|                                          | XP_383909                                                                         |
| Homo sapiens                             | AAP36260                                                                          |
| Homo sapiens                             | P07099                                                                            |
| Homo sapiens                             | P34913                                                                            |
| Kluyveromyces lactis NRRL Y-1140         | XP_451455                                                                         |
| Magnaporthe grisea 70-15                 | XP_359602; XP_366994; XP_369638;<br>XP_364758; XP_360844; XP_364277;<br>XP_368501 |
| Manduca sexta                            | Q25489                                                                            |
| Mus musculus                             | NP_031966                                                                         |
| Neurospora crassa                        | XP_322436; XP_330900; XP_330112                                                   |
| Oryza sativa (rice)                      | NP_912787; NP_922168; NP_922166;<br>XP_470157                                     |
| Saccharomyces cerevisiae                 | NP_014462                                                                         |
| Saccharomyces paradoxus NRRL Y-17217     | DAA02268;                                                                         |
| Solanum tuberosum                        | AAA81892; AAA81893                                                                |
| Tetraodon nigroviridis                   | CAG05638; CAG00866                                                                |
| Yarrowia lipolytica CLIB122              | XP_502171; XP_499652; XP_504164                                                   |
| Other                                    |                                                                                   |
| Environmental DNA libraries <sup>1</sup> | BD8877; BD9300; BD9883; BD9884;<br>BD10332; BD10721                               |

- (1) Zhao, L.; Han, B.; Huang, Z.; Miller, M.; Huang, H.; Malashock, D. S.; Zhu, Z.; Milan, A.; Robertson, D. E.; Weiner, D. P.; Burk, M. J. (2004) Epoxide hydrolase-catalyzed enantioselective synthesis of chiral 1,2-diols via desymmetrization of meso-epoxides, *J. Am. Chem. Soc.* 126, 11156-11157.





**Figure S2.** SDS-PAGE analysis on a 12% acrylamide gel of purified enzymes. (A) SgcF variants as follows: lane 1, molecular weight markers; lane 2, WT; lane 3, W236Y; lane 4, Q237M; lane 5, W236Y/Q237M. (B) SpoF (lane 2) and SgrF (lane 3), with molecular weight markers in lane 1.

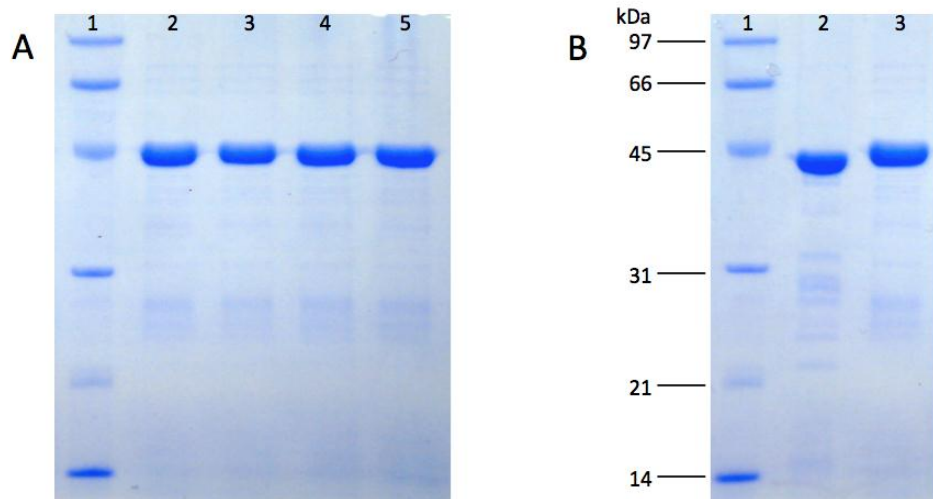

**Figure S3.** Steady-state kinetic analysis of (A) SgcF (W236Y), (B) SgcF (Q237M), (C) SgcF (W236Y/Q237M), (D) SpoF, and (E) SgrF towards (*S*- (left) and (*R*)-styrene oxide (right)). Solid lines represent best fits of appropriate equations to initial rate data (black squares) as follows: Michaelis-Menten equation for B [(*R*)-styrene oxide], D, and E; substrate inhibition for A and C; linear fit for estimation of  $k_{cat}/K_m$  in B [(*S*)-styrene oxide].

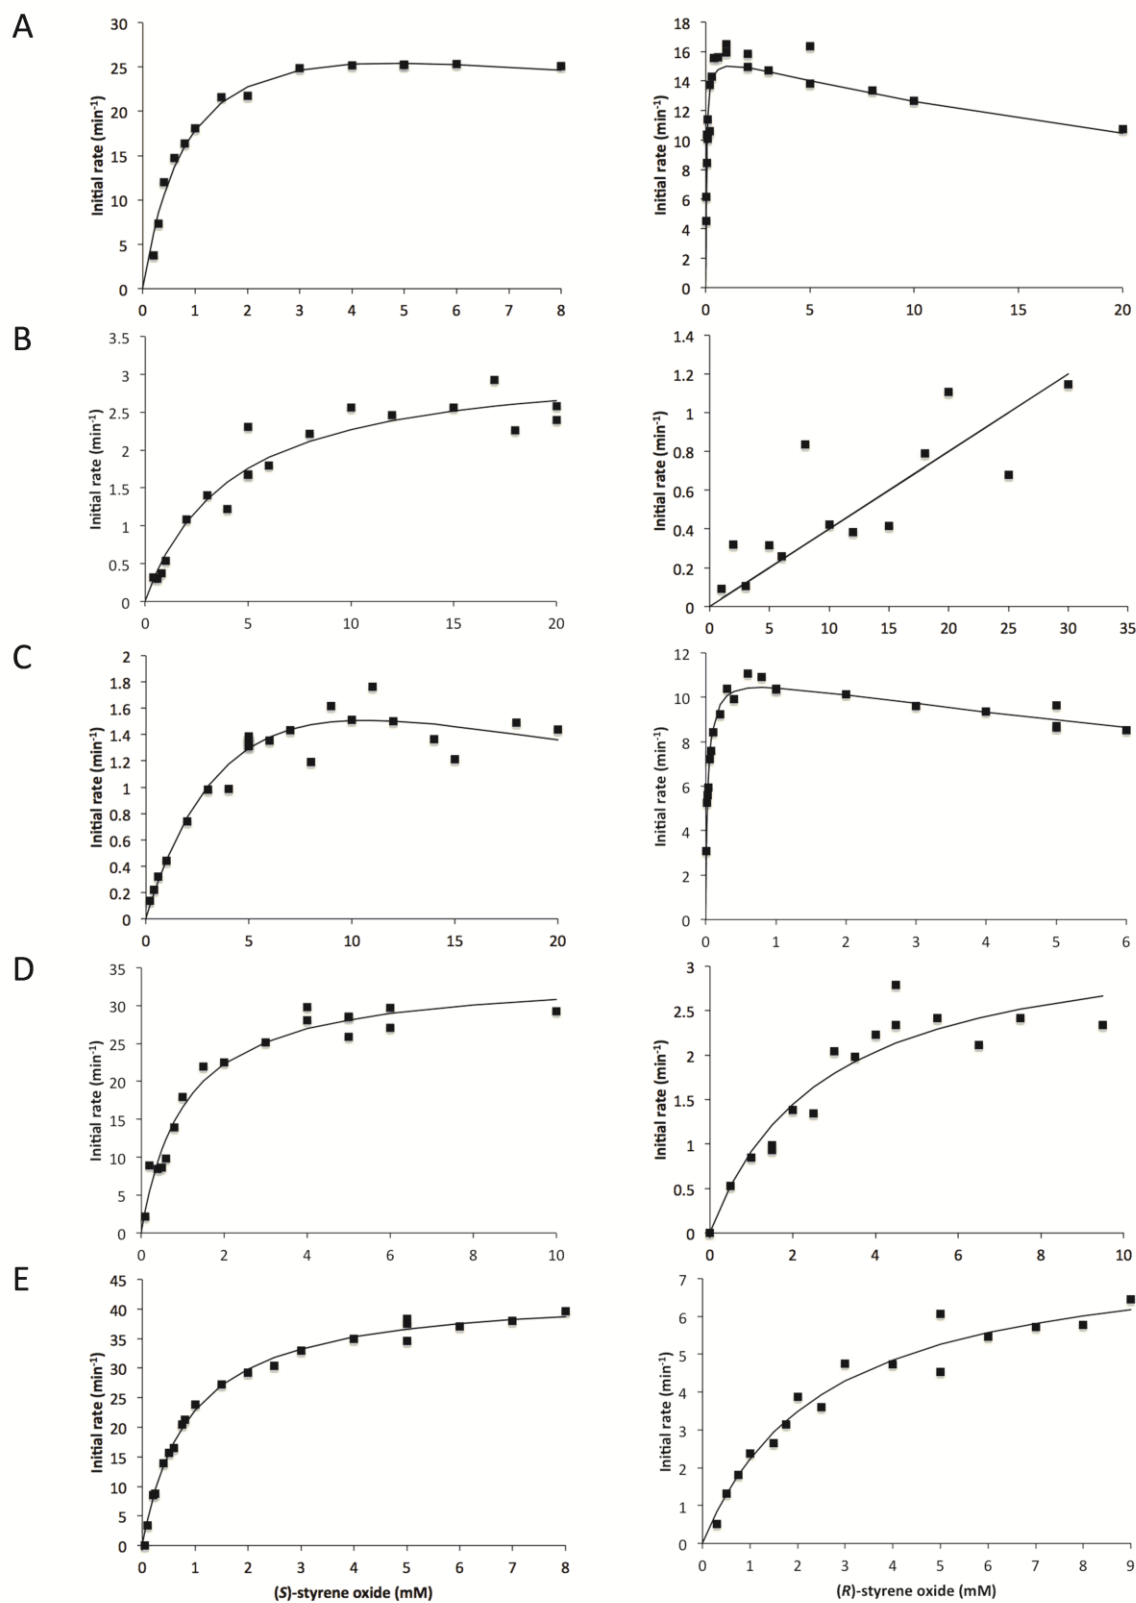

Supplement: NIHMS506028-supplement-1_si_001.pdf [file NIHMS506028-supplement-1_si_001.pdf]
